# Supplementary material
Source: PubMed Central journal article supplement (PMC2708060)
Supplement: pro0018-0410-SD1.pdf [file pro0018-0410-SD1.pdf]

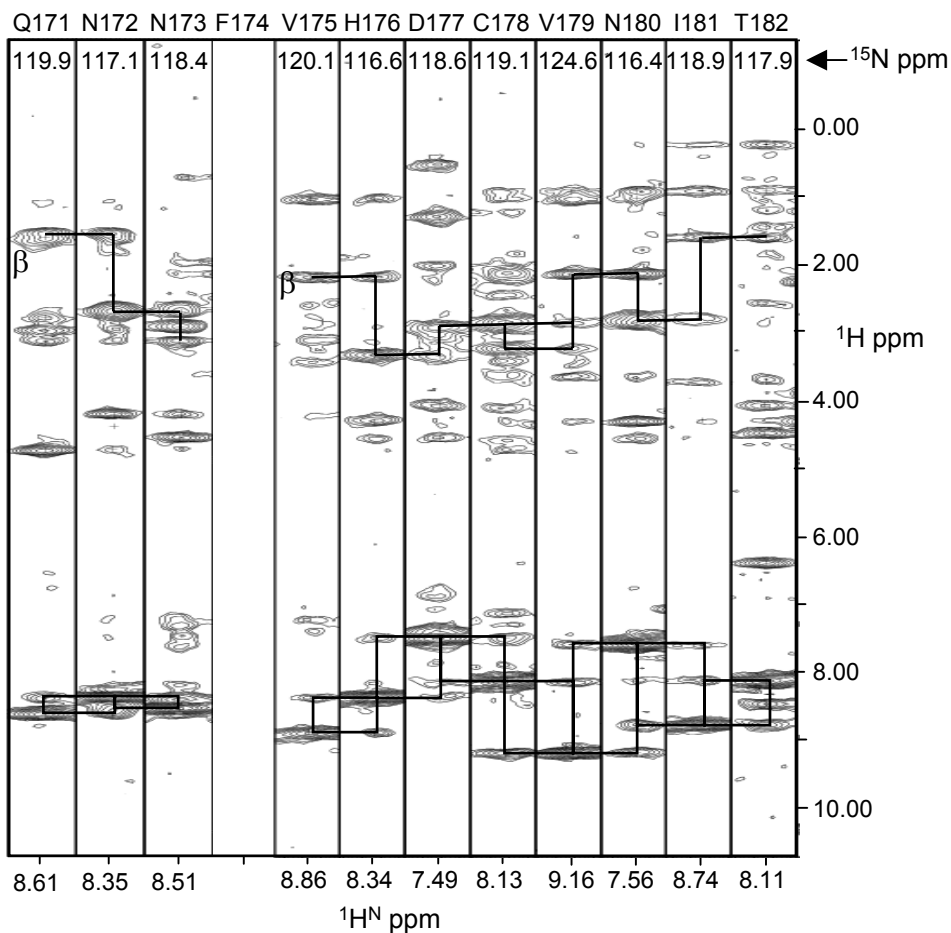

**Supplemental Figure S1:** Series of strips from  $^1\text{H}$ - $^1\text{H}_{\text{N}}$  slices of the 3D  $^{15}\text{N}$  NOESY-HSQC. Each strip corresponds to a single residue within helix-B; Q171-T182. Solid lines highlight sequential  $\beta$ - $\beta$  connectivities and NH-NH connectivities. Characteristic  $i$ - $i+3$  NOEs are clearly apparent in many strips. A strip corresponding to F174 could not be assigned, we note a proline for mouse PrP has been reported at this position [12].

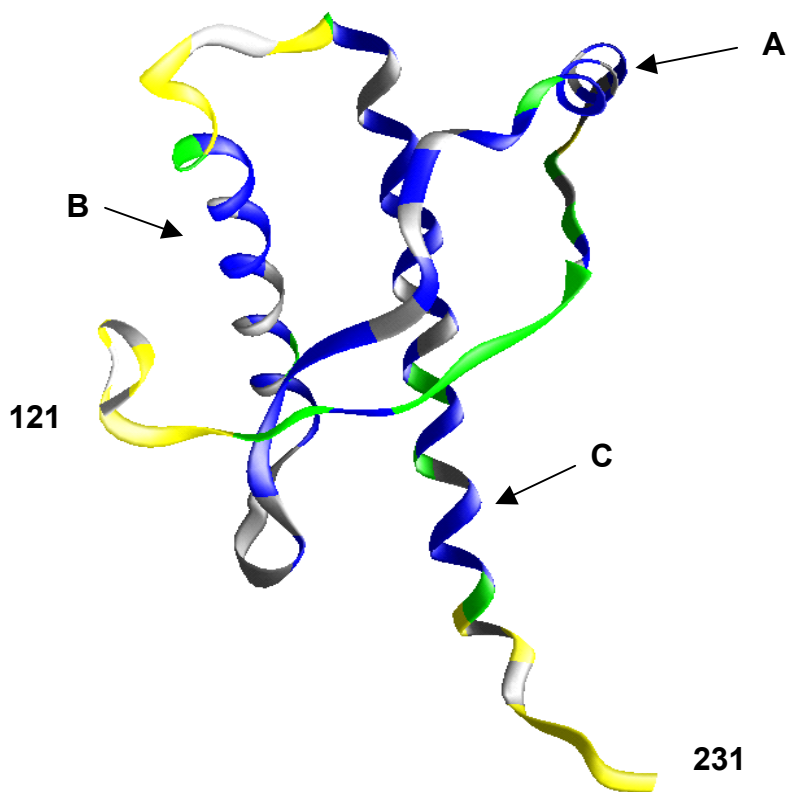

**Supplemental Figure S2:** Values for  $J(0.87\omega_H)$  for mPrP(113-231) mapped onto the structure of mPrP<sup>C</sup>, (1xyx)  $J(\omega_H) < 0.006$  ns in blue indicate little fast internal motions. Green  $0.006 < J(\omega_H) < 0.008$  ns while yellow  $> 0.008$  ns indicates the regions with significant fast-motion flexibility. Residues in gray have no  $J(0.87\omega_H)$  value calculated.

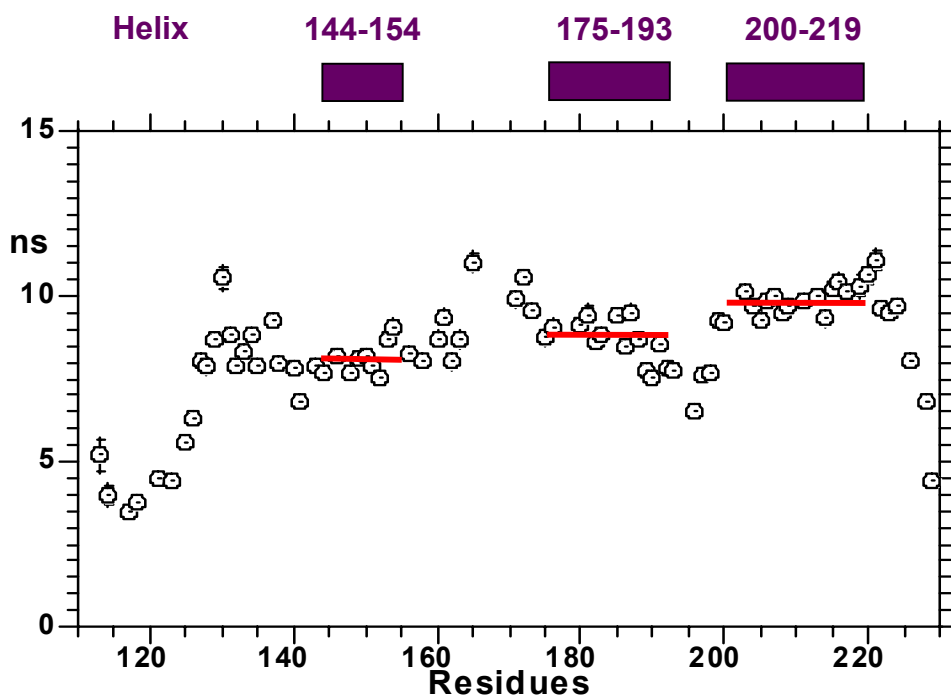

**Supplemental Fig S3: Rotational correlation times per residue ( $\tau_{ci}$ ).**

Calculated from spectral densities, equation (2). Mean values for the three helices are highlighted in red. Mean values for helix A, B and C are; 8.1, 8.6, 9.9 ns respectively

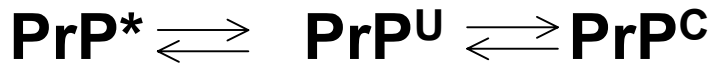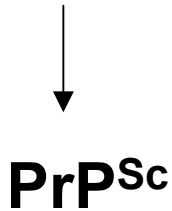

**Folding pathway 1:**

PrP\*, the precursor for amyloid formation, could require the complete unfolding of PrP<sup>C</sup>

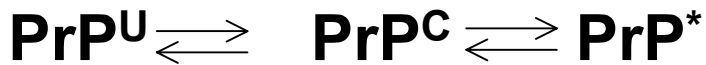

**Folding pathway 2:**

PrP<sup>C</sup> could be a kinetically trapped intermediate to the formation of PrP\* and PrP<sup>Sc</sup>.

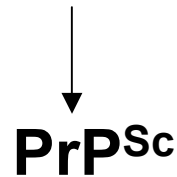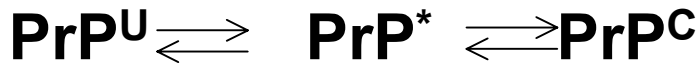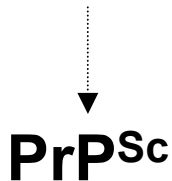

**Folding pathway 3:**

PrP\* might represent a sampled conformation formed on the way to a more stable native PrP<sup>C</sup>.

**Supplemental Figure S4:** PrP folding intermediates

U, unfolded; \*intermediate; Sc scrapie; C cellular

$$\begin{aligned} \sigma_{\text{NH}} &= R_1(\text{NOE} - 1)\gamma_{\text{N}}/\gamma_{\text{H}} \\ J(0) &= (6R_2 - 3R_1 - 2.72\sigma_{\text{NH}})/(3d^2 + 4c^2) \\ J(\omega_{\text{N}}) &= (4R_1 - 5\sigma_{\text{NH}})/(3d^2 + 4c^2) \\ J(0.87\omega_{\text{H}}) &= 4\sigma_{\text{NH}}/(5d^2) \end{aligned}$$

where  $d = \mu\hbar\gamma_{\text{N}}\gamma_{\text{H}} r^{-3}$  and  
 $c = \omega_{\text{N}} \Delta\sigma 3^{-1/2}$

**Supplemental Figure S5:** Equations to calculate reduced spectral densities at these three frequencies were obtained from the relaxation rates  $R_1$  ( $1/T_1$ ),  $R_2$  ( $1/T_2$ ) and the hetero-nuclear NOE Taken from Farrow et al. (43)
